# Supplementary material for: The Antiviral Activity of Approved and Novel Drugs against HIV-1 Mutations Evaluated under the Consideration of Dose-Response Curve Slope
Source: PLoS One. 2016 Mar 1;11(3):e0149467. doi: 10.1371/journal.pone.0149467 (PMC4773073; doi:10.1371/journal.pone.0149467)
Supplement: S1 Table — (XLSX) [file pone.0149467.s001.xlsx]

## Sheet: Supplementary material
Fold changes in IC50 of various drugs for the protease inhibitors resistance mutations
Mutations		IDV	NFV	RTV	SQV
M46I	Experiment 1	1.06458	2.26717	0.734806	0.179958
	Experiment 2	1.12526	1.7304	1.38275	0.128158
	Experiment 3	1.17898	2.44947	1.02683	0.170001
	Mean	1.12294	2.14901	1.04813	0.159372
	Standard deviation	0.0572378	0.373813	0.324494	0.0274871
I54V	Experiment 1	0.946416	0.97892	0.365402	0.106766
	Experiment 2	0.960334	0.969371	0.430477	0.124129
	Experiment 3	0.946416	0.966477	0.202194	0.0707073
	Mean	0.951055	0.971589	0.332691	0.100534
	Standard deviation	0.00803549	0.00651124	0.117605	0.0272505
V82A	Experiment 1	0.900348	1.53001	1.13	0.341402
	Experiment 2	1.18733	1.30142	3.62882	0.747745
	Experiment 3	1.18887	1.95321	2.97954	0.363369
	Mean	1.09218	1.59488	2.57945	0.484172
	Standard deviation	0.166136	0.330703	1.29656	0.228525
M46I\N88S	Experiment 1	5.49339	20.9934	1.84999	0.324231
	Experiment 2	6.5762	22.4836	2.10347	0.390036
	Experiment 3	5.18859	6.15044	2.37326	0.392722
	Mean	5.75273	16.5425	2.1089	0.368996
	Standard deviation	0.729252	9.03056	0.261679	0.0387914
G48V\I54V	Experiment 1	2.2	55.0082	1.62215	11.1812
	Experiment 2	2.91162	44.8515	1.64468	11.3289
	Experiment 3	1.49756	55.4697	1.71806	10.101
	Mean	2.20306	51.7765	1.66163	10.8704
	Standard deviation	0.707034	6.00164	0.0501503	0.67034
M46I\V82T\I84V	Experiment 1	0.76	5.61078	5.41951	0.25737
	Experiment 2	0.7	7.43232	10.2194	0.241734
	Experiment 3	0.642171	3.22641	7.03824	0.249984
	Mean	0.700724	5.42317	7.55905	0.249696
	Standard deviation	0.0589177	2.10922	2.44195	0.00782196
G48V\I54V\V82A	Experiment 1	2.99513	67.1311	10.8805	10.3025
	Experiment 2	6.31454	67.4798	14.5909	8.59116
	Experiment 3	3.05358	69.7947	12.6964	5.31163
	Mean	4.12109	68.1352	12.7226	8.06842
	Standard deviation	1.89982	1.44771	1.85531	2.53616
WT-NL4.3	Experiment 1	1	1	1	1
	Experiment 2	1	1	1	1
	Experiment 3	1	1	1	1
	Mean	1	1	1	1
	Standard deviation	0	0	0	0
* The fold change in IC50 was computed as: IC50mutant / IC50NL4-3.
